# Supplementary material for: Multi-measure assessment of adherence to antiretroviral therapy among children under five years living with HIV in Jinja, Uganda
Source: Springer Nature journal article supplement (doi:10.1186/s12889-020-09430-w), 2020-08-31
Supplement: MOESM1 [file 18333028]

## QUESTIONNAIRE:

### Factors associated with non-adherence to anti-retroviral therapy among HIV positive children under five years in Jinja district.

Hello. My name is \_\_\_\_\_ and I am a \_\_\_\_\_ from \_\_\_\_\_. I am going to ask you a few questions about your child and their experience with their anti-retroviral therapy. I will also ask you some questions about you and your family and your experience with this health facility to understand the factors that affect adherence to anti-retroviral therapy among children less than five years old. This questionnaire takes approximately 30-45 minutes. It is completely voluntary, and you can choose to skip a question or end the survey at any time. All information will be kept confidential and your name will not be attached to any of the information. Do you have any questions before we begin?

| Code     |                                  | Code     |                     |
|----------|----------------------------------|----------|---------------------|
| date_int | Date of interview: (dd/mm/yyyy)  | intr_id  | Interviewer number: |
| stime    | Start time of interview: (am/pm) | part_id  | Participant ID:     |
| etime    | End time of interview: (am/pm)   | facility | Health facility:    |

### SCREENING QUESTIONS

| No. | Code       | Question                                 | Responses              |
|-----|------------|------------------------------------------|------------------------|
| 1.  | age_cd     | How old is this child?                   | _____ (age in months)  |
| 2.  | dur_art    | How long has this child been on ART?     | _____ (time in months) |
| 3.  | timelength | How long have you lived with this child? | _____ (months)         |

### SECTION A: Child characteristics

**First, I am going to ask you some questions about your child**

| No.    | Code      | Question                                                                                                                     | Responses                                                                                            |
|--------|-----------|------------------------------------------------------------------------------------------------------------------------------|------------------------------------------------------------------------------------------------------|
| 4.     | sex_cd    | Sex?                                                                                                                         | 1. Male [0]<br>2. Female [1]                                                                         |
| 5.     | pod       | Where was this child delivered?                                                                                              | 1. Home [0]<br>2. Public Health Facility [1]<br>3. Private Health Facility [2]<br>4. Don't know [99] |
| 6.     | school    | Is this child in school/daycare?                                                                                             | 1. Yes [1]<br>2. No [0]                                                                              |
| 7. (a) | vacc_card | Do you have your child's vaccination card with you?                                                                          | 1. Yes [1]<br>2. No (Skip the next question) [0]                                                     |
| 7 (b)  | vacc_stat | Verify with the vaccination card if the child has received all the vaccines they are scheduled to have received by this age? | 1. Yes [1]<br>2. No [0]                                                                              |

|     |             |                                                                         |                                                           |
|-----|-------------|-------------------------------------------------------------------------|-----------------------------------------------------------|
| 8.  | birth_order | What is this child's birth order?                                       | (number)                                                  |
| 9.  | sib_art     | Is any of this child's siblings (biological and non-biological) on ART? | 1. Yes [1]<br>2. No [0]<br>3. N/A (Has no siblings) [999] |
| 10. | side_eff    | Has your child experienced any side effects with their HIV medication?  | 1. Yes [1]<br>2. No [0]<br>3. Don't know [99]             |
| 11. | ill         | Has the child been ill at any time in the last one month?               | 1. Yes [1]<br>2. No [0]<br>3. Don't know [99]             |

### SECTION B: Caregiver characteristics

Now I am going to ask you some questions about you and your health

| No. | Code      | Question                                               | Responses                                                                                                                                                                                                                                                                                                |
|-----|-----------|--------------------------------------------------------|----------------------------------------------------------------------------------------------------------------------------------------------------------------------------------------------------------------------------------------------------------------------------------------------------------|
| 12. | age_cg    | How old are you?                                       | (age in complete years)                                                                                                                                                                                                                                                                                  |
| 13. | sex_cg    | Sex                                                    | 1. Male [0]<br>2. Female [1]                                                                                                                                                                                                                                                                             |
| 14. | tribe     | What is your tribe?                                    |                                                                                                                                                                                                                                                                                                          |
| 15. | residence | Do you live in an urban or rural area?                 | 1. Urban [1]<br>2. Rural [0]                                                                                                                                                                                                                                                                             |
| 16. | religion  | What is your religion?                                 | 1. Protestant [1]<br>2. Catholic [2]<br>3. Moslem [3]<br>4. Seventh Day Adventist [4]<br>5. Saved/Pentecostal [5]<br>6. None [0]<br>7. Other (specify) [6] religion_b                                                                                                                                    |
| 17. | educ      | What is the highest education level you have attained? | 1. None [0]<br>2. Primary [1]<br>3. O level [2]<br>4. A level [3]<br>5. Vocational [4]<br>6. Diploma [5]<br>7. Degree [6]                                                                                                                                                                                |
| 18. | maristat  | What is your marital status?                           | 1. Never married [0]<br>2. Living with partner but not married [1]<br>3. Married [2]<br>4. Divorced/Separated [3]<br>5. Widow/Widower [4]                                                                                                                                                                |
| 19. | occup     | What are you currently doing for a living?             | 1. No job/ jobless [0]<br>2. Farmer [1]<br>3. Casual labour [2]<br>4. Housewife/Househusband [3]<br>5. Small trader [4]<br>6. Police/military [5]<br>7. Office/clerical [6]<br>8. Professional (including health workers and teachers) [7]<br>9. Service (Restaurant, Hotel, etc) [8]<br>10. Student [9] |

|     |          |                                                                                                                                       |                                                                                                                                                                                             |
|-----|----------|---------------------------------------------------------------------------------------------------------------------------------------|---------------------------------------------------------------------------------------------------------------------------------------------------------------------------------------------|
|     |          |                                                                                                                                       | 11. Other (specify) [10] occup_b                                                                                                                                                            |
| 20. | income   | Approximately, how much do you earn per month? (Gross pay)                                                                            | (Uganda shillings)                                                                                                                                                                          |
| 21. | support  | What is your main source of financial support presently?<br>(select one response)                                                     | 1. From your income [0]<br>2. Support from family [1]<br>3. Support from partner [2]<br>4. Support from friends [3]<br>5. Social support (from charities, churches, organizations, etc) [4] |
| 22. | hiv      | What is your HIV status?                                                                                                              | 1. Positive [1]<br>2. Negative (Skip Q12) [0]<br>3. Don't know (Skip Q12) [99]                                                                                                              |
| 23. | art      | If HIV positive, are you on ART?                                                                                                      | 1. Yes [1]<br>2. No [0]                                                                                                                                                                     |
| 24. | means    | What means of transport do you most often use to get to this clinic to collect medicine for the child?                                | 1. Walking [0]<br>2. Driving (private car or special hire) [1]<br>3. Boda boda [2]<br>4. Taxi [3]<br>5. Bicycle [4]<br>6. Other (Specify) [5] means_b                                       |
| 25. | fare     | How much do you typically spend on transport to the clinic for you and the child to collect medicine for the child (to and fro fare)? | (Uganda shillings)                                                                                                                                                                          |
| 26. | fare_trb | Do you ever have trouble finding money for transport for you and the child to the clinic?                                             | 1. Rarely [0]<br>2. Sometimes [1]<br>3. Often [2]                                                                                                                                           |
| 27. | time     | How long does it typically take you to get from your home to the clinic to collect medicine for the child (one-way)?                  | (minutes)                                                                                                                                                                                   |
| 28. | chn_no   | How many children do you take care of (biological and non-biological)?                                                                | (number)                                                                                                                                                                                    |
| 29. | chn_live | How many of these children live with you?                                                                                             | .....(number)                                                                                                                                                                               |
| 30. | relation | What is your relation to this child?                                                                                                  | 1. Biological parent [0]<br>2. Non-biological legal guardian [1]<br>3. Other blood relative [2]<br>4. Other non-blood relationship [3]                                                      |

### Beliefs about medicine

I would like to ask you about your personal views about medicines prescribed for your child. These are statements other people have made about their medication. Please indicate the extent to which you agree or disagree with them by selecting whether you strongly agree, agree, are uncertain, disagree or strongly disagree. There are no right or wrong answers. I am interested in your personal views.

|                             |        |                                                                             |                                                                                                                                                                                    |
|-----------------------------|--------|-----------------------------------------------------------------------------|------------------------------------------------------------------------------------------------------------------------------------------------------------------------------------|
| 31.                         | bmqs1  | My child's health presently depends on their antiretroviral (ARV) medicines | <ol style="list-style-type: none"> <li>1. Strongly agree [5]</li> <li>2. Agree [4]</li> <li>3. Uncertain [3]</li> <li>4. Disagree [2]</li> <li>5. Strongly disagree [1]</li> </ol> |
| 32.                         | bmqs2  | Having to give my child ARVs worries me                                     | <ol style="list-style-type: none"> <li>1. Strongly agree [5]</li> <li>2. Agree [4]</li> <li>3. Uncertain [3]</li> <li>4. Disagree [2]</li> <li>5. Strongly disagree [1]</li> </ol> |
| 33.                         | bmqs3  | My child's life would be impossible without their ARVs                      | <ol style="list-style-type: none"> <li>1. Strongly agree [5]</li> <li>2. Agree [4]</li> <li>3. Uncertain [3]</li> <li>4. Disagree [2]</li> <li>5. Strongly disagree [1]</li> </ol> |
| 34.                         | bmqs4  | Without my child's ARVs he/she would be very ill                            | <ol style="list-style-type: none"> <li>1. Strongly agree [5]</li> <li>2. Agree [4]</li> <li>3. Uncertain [3]</li> <li>4. Disagree [2]</li> <li>5. Strongly disagree [1]</li> </ol> |
| 35.                         | bmqs5  | I sometimes worry about the long-term effects of my child's ARVs            | <ol style="list-style-type: none"> <li>1. Strongly agree [5]</li> <li>2. Agree [4]</li> <li>3. Uncertain [3]</li> <li>4. Disagree [2]</li> <li>5. Strongly disagree [1]</li> </ol> |
| 36.                         | bmqs6  | My child's ARVs are a mystery to me                                         | <ol style="list-style-type: none"> <li>1. Strongly agree [5]</li> <li>2. Agree [4]</li> <li>3. Uncertain [3]</li> <li>4. Disagree [2]</li> <li>5. Strongly disagree [1]</li> </ol> |
| 37.                         | bmqs7  | My child's health in the future will depend on their ARVs                   | <ol style="list-style-type: none"> <li>1. Strongly agree [5]</li> <li>2. Agree [4]</li> <li>3. Uncertain [3]</li> <li>4. Disagree [2]</li> <li>5. Strongly disagree [1]</li> </ol> |
| 38.                         | bmqs8  | My child's ARVs disrupt their life                                          | <ol style="list-style-type: none"> <li>1. Strongly agree [5]</li> <li>2. Agree [4]</li> <li>3. Uncertain [3]</li> <li>4. Disagree [2]</li> <li>5. Strongly disagree [1]</li> </ol> |
| 39.                         | bmqs9  | I sometimes worry about my child becoming dependent on their ARVs           | <ol style="list-style-type: none"> <li>1. Strongly agree [5]</li> <li>2. Agree [4]</li> <li>3. Uncertain [3]</li> <li>4. Disagree [2]</li> <li>5. Strongly disagree [1]</li> </ol> |
| 40.                         | bmqs10 | My child's ARVs protect them from becoming worse                            | <ol style="list-style-type: none"> <li>1. Strongly agree [5]</li> <li>2. Agree [4]</li> <li>3. Uncertain [3]</li> <li>4. Disagree [2]</li> <li>5. Strongly disagree [1]</li> </ol> |
| <b>Alcohol and drug use</b> |        |                                                                             |                                                                                                                                                                                    |

People have different health habits. The following questions ask about your alcohol and drug use, past and current. An alcoholic beverage here refers to beer, wine, vodka, whiskey, local brew or a mixed drink.

|         |         |                                                                                                                                                                                                                                            |                                                                                                                                                                                                                                                                                   |
|---------|---------|--------------------------------------------------------------------------------------------------------------------------------------------------------------------------------------------------------------------------------------------|-----------------------------------------------------------------------------------------------------------------------------------------------------------------------------------------------------------------------------------------------------------------------------------|
| 41. (a) | alc_use | How often have you had an alcoholic drink in the last 30 days?                                                                                                                                                                             | <ol style="list-style-type: none"> <li>1. Never [0]</li> <li>2. Once a month [1]</li> <li>3. 2 or 3 times a month [2]</li> <li>4. Once or twice a week [3]</li> <li>5. 3 or 4 times a week [4]</li> <li>6. Nearly every day [5]</li> <li>7. Daily [6]</li> </ol>                  |
|         |         |                                                                                                                                                                                                                                            | If never, skip ahead to question 41                                                                                                                                                                                                                                               |
| 41 (b)  | alc_qty | On days when you drank any alcoholic beverages in the last 30 days, how many drinks did you usually have altogether? By a drink we mean a can or glass of beer, a glass of wine, a shot of liquor, or a mixed drink with a shot of liquor? | <ol style="list-style-type: none"> <li>1. 1 or 2 drinks per day [1]</li> <li>2. 3 or 4 drinks per day [2]</li> <li>3. 5 or 6 drinks per day [3]</li> <li>4. 7 or 8 drinks per day [4]</li> <li>5. 9 to 11 drinks per day [5]</li> <li>6. 12 or more drinks per day [6]</li> </ol> |
| 41 (c)  | alc_hvy | During the past 30 days, how often have you had 5 or more drinks of alcohol in a row, that is, within a couple of hours (for example 2 to 4 hours)?                                                                                        | <ol style="list-style-type: none"> <li>1. Never [0]</li> <li>2. Once a month [1]</li> <li>3. 2 or 3 times a month [2]</li> <li>4. Once or twice a week [3]</li> <li>5. 3 or 4 times a week [4]</li> <li>6. Nearly everyday [5]</li> <li>7. Daily [6]</li> </ol>                   |
| 42. (a) | drg_use | Have you ever used marijuana or any other illicit drug?                                                                                                                                                                                    | <ol style="list-style-type: none"> <li>1. Yes [1]</li> <li>2. No (Skip the next question) [0]</li> </ol>                                                                                                                                                                          |
| 42 (b)  | drg_hvy | If you used it, have you used it within the past 6 months?                                                                                                                                                                                 | <ol style="list-style-type: none"> <li>1. Yes [1]</li> <li>2. No [0]</li> </ol>                                                                                                                                                                                                   |

### Household food security

Now I am going to ask you about the availability of food in your home.

|         |      |                                                                                                                                          |                                                                                                                                                                                                                                           |
|---------|------|------------------------------------------------------------------------------------------------------------------------------------------|-------------------------------------------------------------------------------------------------------------------------------------------------------------------------------------------------------------------------------------------|
| 43. (a) | hfs1 | In the past four weeks, did you worry that your household would not have enough food?                                                    | <ol style="list-style-type: none"> <li>1. No (Skip the next question) [0]</li> <li>2. Yes [1]</li> </ol>                                                                                                                                  |
| 43 (b)  | hfs2 | How often did this happen?                                                                                                               | <ol style="list-style-type: none"> <li>1. Rarely (once or twice in the past four weeks) [1]</li> <li>2. Sometimes (3 to 10 times in the past four weeks) [2]</li> <li>3. Often (more than 10 times in the past four weeks) [3]</li> </ol> |
| 44. (a) | hfs3 | In the past four weeks, were you or any household member not able to eat the kinds of food you preferred because of a lack of resources? | <ol style="list-style-type: none"> <li>1. No (Skip next question) [0]</li> <li>2. Yes [1]</li> </ol>                                                                                                                                      |

|         |       |                                                                                                                                                                                |                                                                                                                 |
|---------|-------|--------------------------------------------------------------------------------------------------------------------------------------------------------------------------------|-----------------------------------------------------------------------------------------------------------------|
| 44 (b)  | hfs4  | How often did this happen?                                                                                                                                                     | <ol style="list-style-type: none"> <li>1. Rarely [1]</li> <li>2. Sometimes [2]</li> <li>3. Often [3]</li> </ol> |
| 45. (a) | hfs5  | In the past four weeks, did you or any household member have to eat a limited variety of foods due to lack of resources?                                                       | <ol style="list-style-type: none"> <li>1. No (Skip next question) [0]</li> <li>2. Yes [1]</li> </ol>            |
| 45 (b)  | hfs6  | How often did this occur?                                                                                                                                                      | <ol style="list-style-type: none"> <li>1. Rarely [1]</li> <li>2. Sometimes [2]</li> <li>3. Often [3]</li> </ol> |
| 46. (a) | hfs7  | In the past four weeks, did you or any household member have to eat some foods that you really did not want to eat because of lack of resources to obtain other types of food? | <ol style="list-style-type: none"> <li>1. No (skip next question) [0]</li> <li>2. Yes [1]</li> </ol>            |
| 46 (b)  | hfs8  | How often did this happen?                                                                                                                                                     | <ol style="list-style-type: none"> <li>1. Rarely [1]</li> <li>2. Sometimes [2]</li> <li>3. Often [3]</li> </ol> |
| 47. (a) | hfs9  | In the past four weeks, did you or any household member have to eat a smaller meal than you felt you needed because there was not enough food?                                 | <ol style="list-style-type: none"> <li>1. No (skip next question) [0]</li> <li>2. Yes [1]</li> </ol>            |
| 47 (b)  | hfs10 | How often did this happen?                                                                                                                                                     | <ol style="list-style-type: none"> <li>1. Rarely [1]</li> <li>2. Sometimes [2]</li> <li>3. Often [3]</li> </ol> |
| 48. (a) | hfs11 | In the past four weeks, did you or any other household member have to eat fewer meals in a day because there was not enough food?                                              | <ol style="list-style-type: none"> <li>1. No (skip next question) [0]</li> <li>2. Yes [1]</li> </ol>            |
| 48 (b)  | hfs12 | How often did this happen?                                                                                                                                                     | <ol style="list-style-type: none"> <li>1. Rarely [1]</li> <li>2. Sometimes [2]</li> <li>3. Often [3]</li> </ol> |
| 49. (a) | hfs13 | In the past four weeks, was there ever no food to eat of any kind in your household because of lack of resources to get food?                                                  | <ol style="list-style-type: none"> <li>1. No (Skip next question) [0]</li> <li>2. Yes [1]</li> </ol>            |
| 49 (b)  | hfs14 | How often did this happen?                                                                                                                                                     | <ol style="list-style-type: none"> <li>1. Rarely [1]</li> <li>2. Sometimes [2]</li> <li>3. Often [3]</li> </ol> |
| 50. (a) | hfs15 | In the past four weeks, did you or any household member go to sleep at night hungry because there was not enough food.                                                         | <ol style="list-style-type: none"> <li>1. No (skip next question) [0]</li> <li>2. Yes [1]</li> </ol>            |
| 50 (b)  | hfs16 | How often did this happen?                                                                                                                                                     | <ol style="list-style-type: none"> <li>4. Rarely [1]</li> <li>5. Sometimes [2]</li> <li>6. Often [3]</li> </ol> |
| 51. (a) | hfs17 | In the past four weeks, did you or any household member go a whole day                                                                                                         | <ol style="list-style-type: none"> <li>1. No (Skip next question) [0]</li> <li>2. Yes [1]</li> </ol>            |

|        |       |                                                                      |                                                   |
|--------|-------|----------------------------------------------------------------------|---------------------------------------------------|
|        |       | and night without eating anything because there was not enough food? |                                                   |
| 51 (b) | hfs18 | How often did this happen?                                           | 1. Rarely [1]<br>2. Sometimes [2]<br>3. Often [3] |

### SECTION C: ART Regimen Characteristics

Most people with children who have HIV have to strictly follow their regimen guidelines such as administering pills or syrups daily at specific times with fixed intervals between doses. We would like you to answer these questions to understand how people with children who have HIV are doing so as to improve your child and others' ART adherence.

| No.                                                                                                                                                                                                                 | Code    | Question                                                                                                                                                                                                                                                                                                                                                                                                                                                                                                                                                                                                                                                                                                                                                                                                                                                                                                                                                                                                                                                                                                                                                           | Response                                    |
|---------------------------------------------------------------------------------------------------------------------------------------------------------------------------------------------------------------------|---------|--------------------------------------------------------------------------------------------------------------------------------------------------------------------------------------------------------------------------------------------------------------------------------------------------------------------------------------------------------------------------------------------------------------------------------------------------------------------------------------------------------------------------------------------------------------------------------------------------------------------------------------------------------------------------------------------------------------------------------------------------------------------------------------------------------------------------------------------------------------------------------------------------------------------------------------------------------------------------------------------------------------------------------------------------------------------------------------------------------------------------------------------------------------------|---------------------------------------------|
| 52.                                                                                                                                                                                                                 | ad_dose | <p>We would like you to show us HOW MUCH of the child's ARV medication they have taken DURING THE PAST 30 DAYS. We would be surprised if this was 100%.</p> <p>Put a cross on the line below at the point showing your best guess about HOW MUCH of the medication the child has taken DURING THE PAST 30 DAYS. E.g. 0% means he/she has taken no medication; 50% means they have taken half of their medication, 100% means they have taken every single dose of medication.</p> 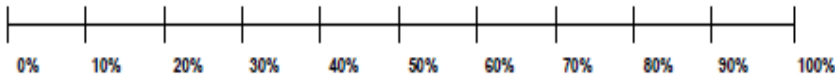                                                                                                                                                                                                                                                                                                                                                                                                                                                                                                                                                                                             | <p>Dose Adherence level:<br/>..... %</p>    |
| 53.                                                                                                                                                                                                                 | ad_time | <p>The following question is about the TIMING OF THE DOSES of the child's ARV drugs. We would like to know HOW MANY DOSES of the medication you have administered WITHIN 2 HOURS OF THE CORRECT TIME DURING THE PAST 30 DAYS. That is how many did you give 2 hours or less away from the correct time. We would be surprised if this was 100% for most people too.</p> <p>What do we mean by the 'correct time'? Well, if you are supposed to give the child's medication twice per day, the 'correct time' to give that Medication is every 12 hours exactly.</p> <p>As explained above, put a cross on the line below at the point showing your best guess about HOW MUCH of the child's medication you gave WITHIN 2 HOURS OF THE CORRECT TIME DURING THE PAST 30 DAYS. E.g. 0% means you haven't given any dose of the Medication within 2 hours of the correct time, 50% means you have given half of the prescribed doses within 2 hours of the correct time and 100% means you have given every single dose of the Medication within 2 hours of the correct time.</p>  | <p>Timing Adherence level:<br/>.....(%)</p> |
| <p><b>Reasons for missing a dose:</b><br/>People may miss taking their medications for various reasons. I'm going to ask you about the reasons why you may have missed giving your child their ARV medications.</p> |         |                                                                                                                                                                                                                                                                                                                                                                                                                                                                                                                                                                                                                                                                                                                                                                                                                                                                                                                                                                                                                                                                                                                                                                    |                                             |

|     |        |                                                                                                       |                                                                                                                                                                                                                                                                                                                                                                                                                                                                                                                                                                                                                                                                                                                                                                                                                                                                                                                                                                                                                                         |
|-----|--------|-------------------------------------------------------------------------------------------------------|-----------------------------------------------------------------------------------------------------------------------------------------------------------------------------------------------------------------------------------------------------------------------------------------------------------------------------------------------------------------------------------------------------------------------------------------------------------------------------------------------------------------------------------------------------------------------------------------------------------------------------------------------------------------------------------------------------------------------------------------------------------------------------------------------------------------------------------------------------------------------------------------------------------------------------------------------------------------------------------------------------------------------------------------|
| 54. | reason | Please indicate which of these has been the main reason you have missed giving your child their ARVs: | <ol style="list-style-type: none"> <li>1. I haven't missed giving my child medicine [1]</li> <li>2. Were away from home [2]</li> <li>3. Were busy with other things [3]</li> <li>4. Simply forgot [4]</li> <li>5. Had too many pills to administer [5]</li> <li>6. Wanted to avoid side effects [6]</li> <li>7. Did not want others to notice you giving the child medication [7]</li> <li>8. I had a change in daily routine [8]</li> <li>9. Felt like the drug was toxic/harmful [9]</li> <li>10. I slept through dose time [10]</li> <li>11. The child slept through the dose time [11]</li> <li>12. The child felt sick or ill [12]</li> <li>13. I felt sick or ill [13]</li> <li>14. I felt depressed or overwhelmed [14]</li> <li>15. I had problems administering the pills/syrups at specified times (e.g. with meals, on empty stomach, etc.) [15]</li> <li>16. We ran out of pills [16]</li> <li>17. The child felt good and I didn't feel the pills were necessary [17]</li> <li>18. Other (specify) [18] reason2</li> </ol> |
|-----|--------|-------------------------------------------------------------------------------------------------------|-----------------------------------------------------------------------------------------------------------------------------------------------------------------------------------------------------------------------------------------------------------------------------------------------------------------------------------------------------------------------------------------------------------------------------------------------------------------------------------------------------------------------------------------------------------------------------------------------------------------------------------------------------------------------------------------------------------------------------------------------------------------------------------------------------------------------------------------------------------------------------------------------------------------------------------------------------------------------------------------------------------------------------------------|

**SECTION D: Health system factors**

**Now I am going to ask you about the child's healthcare providers and services at this facility**

| No.                                                                                                                                                                                                                                                                                              | Code  | Question                                                                                                   | Response                                                                                                                                                                                                              |
|--------------------------------------------------------------------------------------------------------------------------------------------------------------------------------------------------------------------------------------------------------------------------------------------------|-------|------------------------------------------------------------------------------------------------------------|-----------------------------------------------------------------------------------------------------------------------------------------------------------------------------------------------------------------------|
| <p><b>Relationship with health care providers (HCPs)</b></p> <p>Each item below is a statement about your relationship with the child's HCP. This is the nurse or doctor that attended to your child today. Please click one response that indicates how you would agree with each sentence.</p> |       |                                                                                                            |                                                                                                                                                                                                                       |
| 55.                                                                                                                                                                                                                                                                                              | rshp1 | Your child's healthcare provider (HCP) greeted you and your child in a way that made you feel comfortable. | <ol style="list-style-type: none"> <li>1. Strongly disagree [1]</li> <li>2. Somewhat disagree [2]</li> <li>3. Neither agree nor disagree [3]</li> <li>4. Somewhat agree [4]</li> <li>5. Strongly agree [5]</li> </ol> |
| 56.                                                                                                                                                                                                                                                                                              | rshp2 | The HCP discussed your reason(s) for coming today?                                                         | <ol style="list-style-type: none"> <li>1. Strongly disagree [1]</li> <li>2. Somewhat disagree [2]</li> <li>3. Neither agree nor disagree [3]</li> </ol>                                                               |



|     |        |                                                                                          |                                                                                                                                                                                                                        |
|-----|--------|------------------------------------------------------------------------------------------|------------------------------------------------------------------------------------------------------------------------------------------------------------------------------------------------------------------------|
|     |        |                                                                                          | <ul style="list-style-type: none"> <li>4. Somewhat agree [4]</li> <li>5. Strongly agree [5]</li> </ul>                                                                                                                 |
| 57. | rshp3  | The HCP encouraged you to express your thoughts concerning your child's health problems. | <ul style="list-style-type: none"> <li>1. Strongly disagree [1]</li> <li>2. Somewhat disagree [2]</li> <li>3. Neither agree nor disagree [3]</li> <li>4. Somewhat agree [4]</li> <li>5. Strongly agree [5]</li> </ul>  |
| 58. | rshp4  | The HCP listened carefully to what you had to say.                                       | <ul style="list-style-type: none"> <li>1. Strongly disagree [1]</li> <li>2. Somewhat disagree [2]</li> <li>3. Neither agree nor disagree [3]</li> <li>4. Somewhat agree [4]</li> <li>5. Strongly agree [5]</li> </ul>  |
| 59. | rshp5  | The HCP understood what you had to say.                                                  | <ul style="list-style-type: none"> <li>1. Strongly disagree [1]</li> <li>2. Somewhat disagree [2]</li> <li>3. Neither agree nor disagree [3]</li> <li>4. Somewhat agree [4]</li> <li>5. Strongly agree [5]</li> </ul>  |
| 60. | rshp6  | The HCP gave you as much information as you wanted.                                      | <ul style="list-style-type: none"> <li>6. Strongly disagree [1]</li> <li>7. Somewhat disagree [2]</li> <li>8. Neither agree nor disagree [3]</li> <li>9. Somewhat agree [4]</li> <li>10. Strongly agree [5]</li> </ul> |
| 61. | rshp7  | The HCP checked to see if the treatment plan was acceptable to you and your child.       | <ul style="list-style-type: none"> <li>1. Strongly disagree [1]</li> <li>2. Somewhat disagree [2]</li> <li>3. Neither agree nor disagree [3]</li> <li>4. Somewhat agree [4]</li> <li>5. Strongly agree [5]</li> </ul>  |
| 62. | rshp8  | The HCP encouraged you to ask questions                                                  | <ul style="list-style-type: none"> <li>1. Strongly disagree [1]</li> <li>2. Somewhat disagree [2]</li> <li>3. Neither agree nor disagree [3]</li> <li>4. Somewhat agree [4]</li> <li>5. Strongly agree [5]</li> </ul>  |
| 63. | rshp9  | The HCP responded to your questions and concerns.                                        | <ul style="list-style-type: none"> <li>1. Strongly disagree [1]</li> <li>2. Somewhat disagree [2]</li> <li>3. Neither agree nor disagree [3]</li> <li>4. Somewhat agree [4]</li> <li>5. Strongly agree [5]</li> </ul>  |
| 64. | rshp10 | The HCP involved you in decisions about your child's health as much as you wanted.       | <ul style="list-style-type: none"> <li>1. Strongly disagree [1]</li> <li>2. Somewhat disagree [2]</li> <li>3. Neither agree nor disagree [3]</li> <li>4. Somewhat agree [4]</li> <li>5. Strongly agree [5]</li> </ul>  |
| 65. | rshp11 | The HCP checked to be sure you understood everything.                                    | <ul style="list-style-type: none"> <li>1. Strongly disagree [1]</li> <li>2. Somewhat disagree [2]</li> <li>3. Neither agree nor disagree [3]</li> <li>4. Somewhat agree [4]</li> <li>5. Strongly agree [5]</li> </ul>  |
| 66. | rshp12 | The HCP spent the right amount of time with your child.                                  | <ul style="list-style-type: none"> <li>1. Strongly disagree [1]</li> <li>2. Somewhat disagree [2]</li> <li>3. Neither agree nor disagree [3]</li> <li>4. Somewhat agree [4]</li> <li>5. Strongly agree [5]</li> </ul>  |

|                                                                                                                                                                                                                                                                              |        |                                                                          |                                                                                                                                             |   |   |   |   |   |   |   |   |    |
|------------------------------------------------------------------------------------------------------------------------------------------------------------------------------------------------------------------------------------------------------------------------------|--------|--------------------------------------------------------------------------|---------------------------------------------------------------------------------------------------------------------------------------------|---|---|---|---|---|---|---|---|----|
| 67.                                                                                                                                                                                                                                                                          | rshp13 | Overall, you were satisfied with your child's visit to the doctor today. | 1. Strongly disagree [1]<br>2. Somewhat disagree [2]<br>3. Neither agree nor disagree [3]<br>4. Somewhat agree [4]<br>5. Strongly agree [5] |   |   |   |   |   |   |   |   |    |
| <b>Satisfaction with the quality of service received at the health facility</b><br><br>Please indicate your satisfaction with each of the following aspects of this clinic by selecting a number from 1 to 10, where 1 means not satisfied and 10 means extremely satisfied. |        |                                                                          |                                                                                                                                             |   |   |   |   |   |   |   |   |    |
| 68.                                                                                                                                                                                                                                                                          | sat1   | Physical environment                                                     | 1                                                                                                                                           | 2 | 3 | 4 | 5 | 6 | 7 | 8 | 9 | 10 |
| 69.                                                                                                                                                                                                                                                                          | sat2   | Equipment and facilities                                                 | 1                                                                                                                                           | 2 | 3 | 4 | 5 | 6 | 7 | 8 | 9 | 10 |
| 70.                                                                                                                                                                                                                                                                          | sat3   | Appointment arrangement                                                  | 1                                                                                                                                           | 2 | 3 | 4 | 5 | 6 | 7 | 8 | 9 | 10 |
| 71.                                                                                                                                                                                                                                                                          | sat4   | Waiting time                                                             | 1                                                                                                                                           | 2 | 3 | 4 | 5 | 6 | 7 | 8 | 9 | 10 |
| 72.                                                                                                                                                                                                                                                                          | sat5   | Service of the pharmacy                                                  | 1                                                                                                                                           | 2 | 3 | 4 | 5 | 6 | 7 | 8 | 9 | 10 |
| 73.                                                                                                                                                                                                                                                                          | sat6   | Support staff                                                            | 1                                                                                                                                           | 2 | 3 | 4 | 5 | 6 | 7 | 8 | 9 | 10 |
| 74.                                                                                                                                                                                                                                                                          | sat7   | Your case physician's professionalism                                    | 1                                                                                                                                           | 2 | 3 | 4 | 5 | 6 | 7 | 8 | 9 | 10 |
| 75.                                                                                                                                                                                                                                                                          | sat8   | Explanations given by your case physician                                | 1                                                                                                                                           | 2 | 3 | 4 | 5 | 6 | 7 | 8 | 9 | 10 |
| 76.                                                                                                                                                                                                                                                                          | sat9   | Consultation time                                                        | 1                                                                                                                                           | 2 | 3 | 4 | 5 | 6 | 7 | 8 | 9 | 10 |

We have come to the end of this survey. We thank you for your time. We greatly appreciate your participation in this study.
