# Supplementary material for: Multi-measure assessment of adherence to antiretroviral therapy among children under five years living with HIV in Jinja, Uganda
Source: Springer Nature journal article supplement (doi:10.1186/s12889-020-09430-w), 2020-08-31
Supplement: MOESM2 [file 18333028]

## DATA ABSTRACTION FORM

### Factors associated with non-adherence to anti-retroviral therapy among children under five years in Jinja district.

|                                           |                             |
|-------------------------------------------|-----------------------------|
| Date of data abstraction:<br>(dd/mm/yyyy) | Interviewer number:         |
| Start time: (am/pm)                       | [part_id] Participant ID:   |
| End time: (am/pm)                         | [facility] Health facility: |

| No.                                                                | Code       | Item                                                                      | Options                                                                                                                                                                       |                          |                          |                             |
|--------------------------------------------------------------------|------------|---------------------------------------------------------------------------|-------------------------------------------------------------------------------------------------------------------------------------------------------------------------------|--------------------------|--------------------------|-----------------------------|
| <b>Medical Record Review</b>                                       |            |                                                                           |                                                                                                                                                                               |                          |                          |                             |
| For the following questions, review the patient's medical records. |            |                                                                           |                                                                                                                                                                               |                          |                          |                             |
| 1.                                                                 | dob_cd     | Child's date of birth                                                     | (dd/mm/yyyy)                                                                                                                                                                  |                          |                          |                             |
| 2.                                                                 | sex_rec    | Sex                                                                       | 1. Female [1]<br>2. Male [0]                                                                                                                                                  |                          |                          |                             |
| 3.                                                                 | vr11       | Record the child's baseline HIV viral load measurement at ART initiation. | .....                                                                                                                                                                         |                          |                          |                             |
| 4.                                                                 | vr12       | Record the child's most recent HIV viral load measurement.                | .....                                                                                                                                                                         |                          |                          |                             |
| <b>Medication Record Review</b>                                    |            |                                                                           |                                                                                                                                                                               |                          |                          |                             |
| For the next questions, review the patient's HIV Care/ART card     |            |                                                                           |                                                                                                                                                                               |                          |                          |                             |
| 5.                                                                 | reg_curr   | ART regimen the child is currently on                                     | 1. ABC+3TC+LPV/r [1]<br>2. ABC+3TC+EFV [2]<br>3. ABC+3TC+NVP [3]<br>4. AZT+3TC+LPV/r [4]<br>5. AZT+3TC+NVP [5]<br>6. AZT+3TC+EFV [6]<br>7. Other (Specify) [7] reg_curr2_____ |                          |                          |                             |
| 6.                                                                 | form       | Formulation of the ARV drugs.                                             | <b>Drug 1</b><br>[form1]                                                                                                                                                      | <b>Drug 2</b><br>[form2] | <b>Drug 3</b><br>[form3] | <b>Drug 4</b><br>[form4]    |
|                                                                    |            |                                                                           | 1.Solid<br>2.Liquid                                                                                                                                                           | 1.Solid<br>2.Liquid      | 1.Solid<br>2.Liquid      | 1.Solid [1]<br>2.Liquid [2] |
| 7.                                                                 | freq       | Dosing frequency                                                          | <b>Drug 1</b><br>[freq1]                                                                                                                                                      | <b>Drug 2</b><br>[freq2] | <b>Drug 3</b><br>[freq3] | <b>Drug 4</b><br>[freq4]    |
|                                                                    |            |                                                                           |                                                                                                                                                                               |                          |                          |                             |
| 8.                                                                 | date_start | Date of first ARV drug pick-up (date started on ART)                      | (dd/mm/yyyy)                                                                                                                                                                  |                          |                          |                             |
| 9.                                                                 | stage      | What was the patient's clinical stage on initiation to ART?               | .....                                                                                                                                                                         |                          |                          |                             |

|     |            |                                                                                                                                                                                                                                                  |                                                                                                                                                                                                                                                                         |
|-----|------------|--------------------------------------------------------------------------------------------------------------------------------------------------------------------------------------------------------------------------------------------------|-------------------------------------------------------------------------------------------------------------------------------------------------------------------------------------------------------------------------------------------------------------------------|
| 10. | reg_stat   | ART regimen picked up on first pick-up/initiation of ART.                                                                                                                                                                                        | <ol style="list-style-type: none"> <li>1. ABC+3TC+LPV/r [1]</li> <li>2. ABC+3TC+EFV [2]</li> <li>3. ABC+3TC+NVP [3]</li> <li>4. AZT+3TC+LPV/r [4]</li> <li>5. AZT/3TC/NVP [5]</li> <li>6. AZT/3TC/EFV [6]</li> <li>7. Other (Specify) [7]<br/>reg_stat2_____</li> </ol> |
| 11. | sidef_hf   | Have side effects/toxicity been reported on the child's ART card?                                                                                                                                                                                | <ol style="list-style-type: none"> <li>1. Yes [1]</li> <li>2. No [0]</li> </ol>                                                                                                                                                                                         |
| 12. | date_first | For this question, review the patient's prescription and dispensing records for the past 90 days. Identify the date of the first supply of medicine in the last 90 days.                                                                         | _____ (dd/mm/yyyy)                                                                                                                                                                                                                                                      |
| 13. | days_unc   | How many days from the date of first supply till today was the patient not covered by the ARV drug supply for all drugs in the ART regimen? ( <i>consider all days when the patient did not have supply of any or all drugs in the regimen</i> ) | _____ (No. of days not covered)                                                                                                                                                                                                                                         |
| 14. | stock_out  | Was any of the drugs in the child's regimen out of stock at any time in the past 3 months?                                                                                                                                                       | <ol style="list-style-type: none"> <li>1. No [0]</li> <li>2. Yes [1]</li> </ol>                                                                                                                                                                                         |
| 15. | no_refill  | How many refills has the child had in the past 3 months?                                                                                                                                                                                         | _____ (number)                                                                                                                                                                                                                                                          |
| 16. | ad_rec     | What is the adherence level recorded in the patient's file?                                                                                                                                                                                      | <ol style="list-style-type: none"> <li>1. G (Good: <math>\geq 95\%</math>) [3]</li> <li>2. F (Fair: 85 – 94%) [2]</li> <li>3. P (Poor: <math>&lt; 85\%</math>) [1]</li> </ol>                                                                                           |
